# Supplementary material for: Biodegradation of Microtoxic Phenylpropanoids (Phenylpropanoic Acid and Ibuprofen) by Bacteria and the Relevance for Their Removal from Wastewater Treatment Plants
Source: MDPI journal article supplement (doi:10.3390/genes14020442), 2023-02-09
Supplement: s1 [file s1]

## Supplementary Materials

**Table S1.** Primer list

| Name      | Sequence (5'-3')       | Target gene                                                  | pRW412a region* |
|-----------|------------------------|--------------------------------------------------------------|-----------------|
| REV       | CAGGAAACAGCTATGAC      | Sequencing primer                                            | -               |
| UNIV      | GTTTTCCCAGTCACGAC      | Sequencing primer                                            | -               |
| GM3F      | AGAGTTTGATCATGGC       | 16S rRNA gene                                                | -               |
| GM4R      | TACCTTGTTACGACTT       | 16S rRNA gene                                                | -               |
| IpfAfor   | GTCTTCGTTGGTCACGACTC   | <i>ipfA</i>                                                  | III             |
| IpfBrev   | TTCACCTCGCGTGACCATG    | <i>ipfB</i>                                                  | III             |
| IpfDfor   | ACCATGGTCACGCGAGTGA    | <i>ipfD</i>                                                  | III             |
| IpfDrev   | GGTGCTATCCATCAATGGCTCC | <i>ipfD</i>                                                  | III             |
| IpfFfor   | GTTATGTTGGCAAGAGACCTGG | <i>ipfF</i>                                                  | III             |
| IpfFrev4  | CTTTCTTGCCTCAGGATGGC   | <i>ipfF</i>                                                  | III             |
| HMSDFor-  | TCCGGCATTTCATCGATG     | <i>ipfM</i>                                                  | I               |
| HMSDRev   | ATGATGGCGCTGTTCTTGC    | <i>ipfM</i>                                                  | I               |
| Ipflfor-  | GAGCGTTTGAAGTCTTGGGC   | <i>ipfl</i>                                                  | II              |
| Ipflrev   | CAATCACGGTGCGTGTGAAG   | <i>ipfl</i>                                                  | II              |
| DDFor     | GACGGCGGAAGTTTTGAA     | Dienoate dehydrogenase gene (DD)                             | IV              |
| DDRev     | CTTGACGACGACGGTGTT     | Dienoate dehydrogenase gene (DD)                             | IV              |
| DsbC2For- | CACAATGCATCCGCTACG     | Thiol:disulfide gene involved in conjugative transfer (DsbC) | V+I             |
| DsbC2Rev  | CGGATCCTTCGCACAATAG    | Thiol:disulfide gene involved in conjugative transfer (DsbC) | V+I             |

\* Roman numerals denote regions delimited by IS6 elements as indicated for pIBU218 of *R. wittichii* MPO218 (Aulestia et al., 2021).

**Table S2.** PCR amplification

| Target gene  | pRW412a region* | <i>R. wittichii</i> RW1 | <i>S. granuli</i> RW412 | <i>R. wittichii</i> RW421 | <i>P.citronellolis</i> RW422 | <i>P.citronellolis</i> RW423 | <i>P.citronellolis</i> RW424 |
|--------------|-----------------|-------------------------|-------------------------|---------------------------|------------------------------|------------------------------|------------------------------|
| <i>ipfAB</i> | III             | ND                      | +                       | +                         | +                            | +                            | -                            |
| <i>ipfD</i>  | III             | ND                      | +                       | +                         | +                            | +                            | -                            |
| <i>ipfF</i>  | III             | ND                      | +                       | +                         | +                            | +                            | -                            |
| <i>ipfM</i>  | I               | -                       | +                       | -                         | +                            | +                            | -                            |
| <i>ipfl</i>  | II              | -                       | +                       | +                         | +                            | +                            | -                            |
| DD           | IV              | -                       | +                       | +                         | +                            | +                            | -                            |
| DsbC         | V+I             | -                       | +                       | -                         | +                            | +                            | -                            |

\* Roman numerals in analogy to that used for pIBU218 of *R. wittichii* MPO218 (Aulestia et al., 2021).

ND: not determined

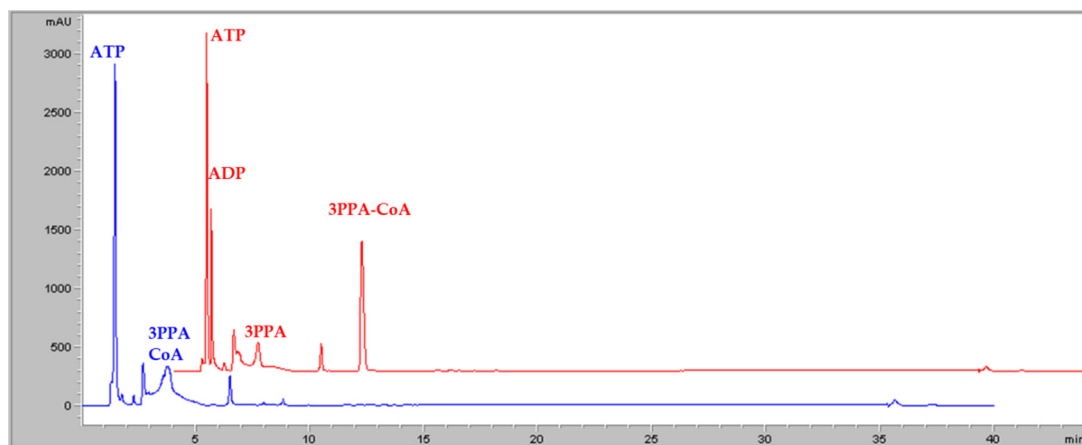

**Figure S1.** Overlay of HPLC chromatograms at 210 nm of the reaction components of 3-phenylpropanoic acid (3PPA) with IpF initially (in blue) and after 35 minutes (in red).

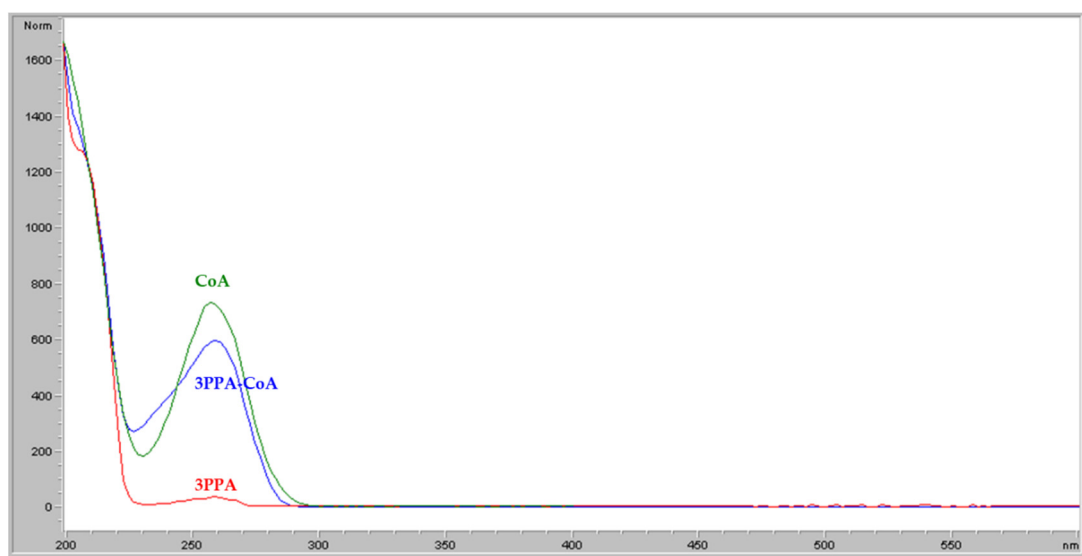

**Figure S2.** Overlay of spectra (200-600 nm) of the 3-phenylpropanoyl-CoA product (3PPA-CoA, in blue) compared to those of 3-phenylpropanoic acid (3PPA, in red) and coenzyme A (CoA, in green).

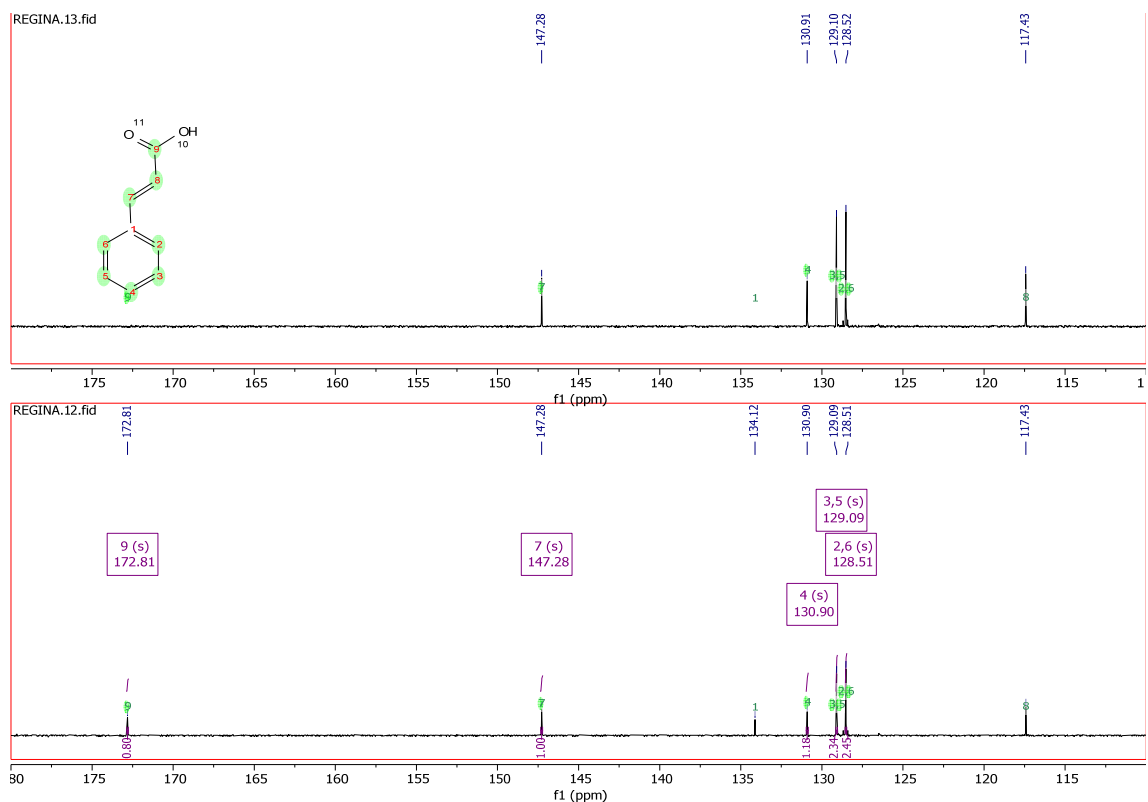

**Figure S3.**  $^{13}\text{C}$  NMR (BB and DEPT135) spectrum of cinnamic acid, recorded at 151 MHz in deuteriochloroform.

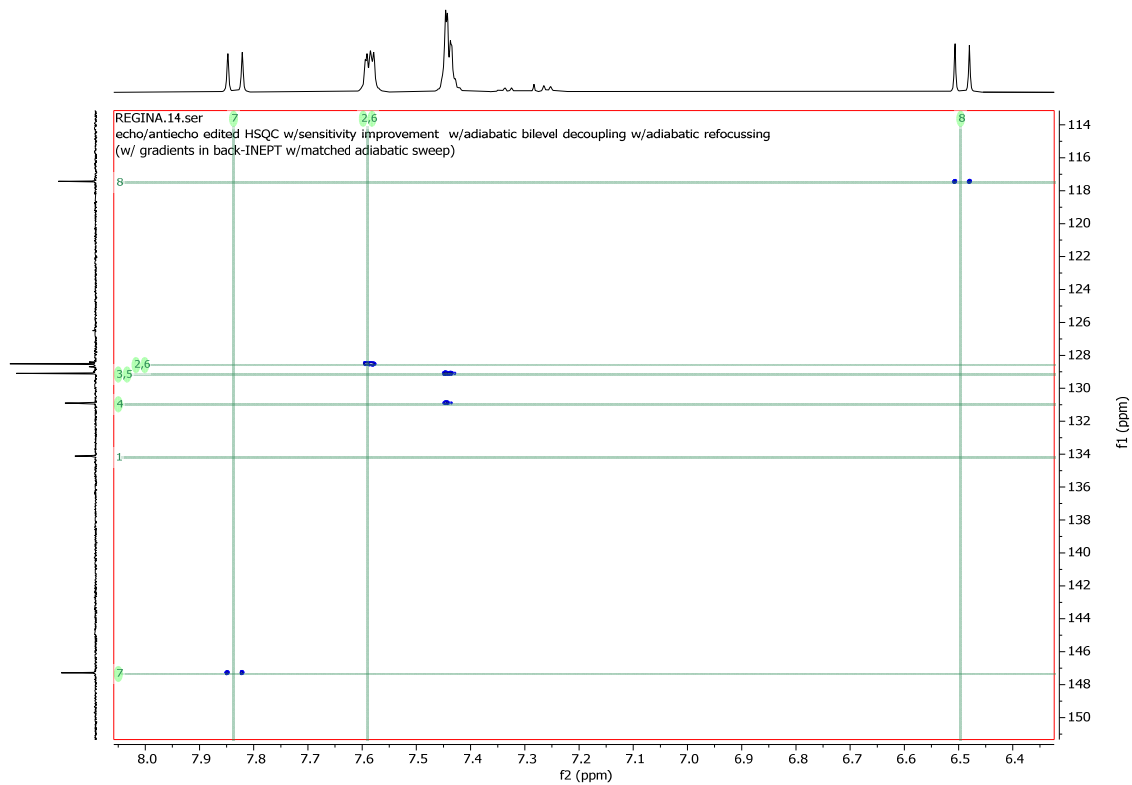

**Figure S4.**  $^1\text{H}$ - $^{13}\text{C}$  HSQC 2D-NMR spectra of cinnamic acid.

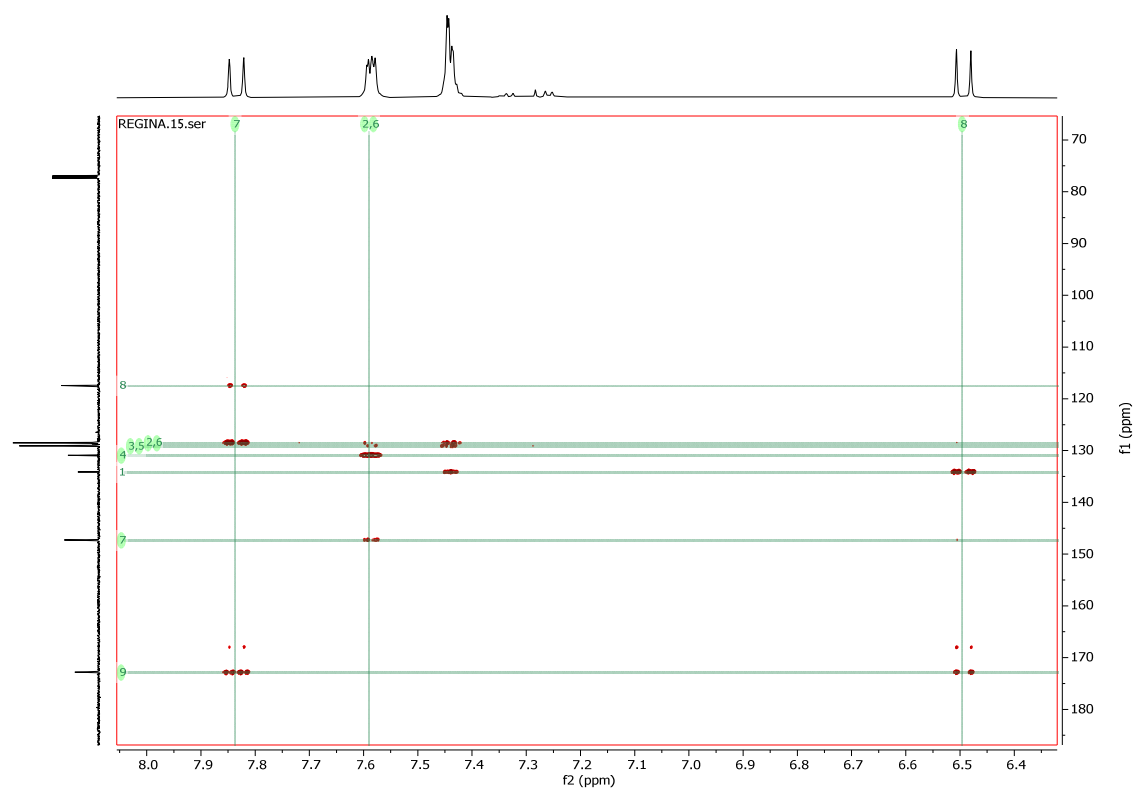

**Figure S5.**  $^1\text{H}$ - $^{13}\text{C}$  HMBC 2D-NMR spectra of cinnamic acid to assign the quaternary carbons.
